# Supplementary material for: Controlled human exposures to diesel exhaust: a human epigenome-wide experiment of target bronchial epithelial cells
Source: PubMed Central journal article supplement — Environ Epigenet. 2021 Apr 9;7(1):dvab003. doi: 10.1093/eep/dvab003 (PMC8035831; doi:10.1093/eep/dvab003), 2021-04-09

## Supplementary Materials

**Table S1. Annotated results for the 80 differentially methylated sites from the EWAS.**

**Table S2. DAVID analysis for CpGs showing biological pathways.** The table includes pathways that achieved an unadjusted  $P$ -value  $<0.05$ , ranked in descending order of enrichment.

**Table S3. Comparison of significant CpGs differentially methylated in our study and other human DE exposure studies.** The  $\Delta\beta$  values calculated in the two other studies correspond to ACE calculations in the current study.

**Figure S1. Manhattan plot for the epigenome-wide analyses with asymptotic  $P$ -values (paired  $t$ -tests).** The dashed orange line is the minimum possible  $P$ -value from an exact test.

**Figure S2. Volcano plot for the epigenome-wide analyses with asymptotic  $P$ -values (paired  $t$ -tests).** The dashed orange line is the minimum possible  $P$ -value from an exact test.

**Figure S3. Quantile-Quantile plot for the epigenome-wide analyses of asymptotic vs. expected  $P$ -values.**

**Table S1.** Annotated results for the 80 differentially methylated sites from the EWAS.

| CpG        | CHR | pos       | UCSC RefGene Name     | UCSC RefGene Group | Relation to CpG Island | Mean %-DNAm Diesel Exhaust (DE) | Mean %-DNAm Clean Air (CA) | Mean Causal Effect (ACE) | Exact <i>P</i> -value | Asymptotic <i>P</i> -value |
|------------|-----|-----------|-----------------------|--------------------|------------------------|---------------------------------|----------------------------|--------------------------|-----------------------|----------------------------|
| cg16987365 | 1   | 2450682   | PANK4                 | Body               | N_Shore                | 92.73                           | 93.89                      | -1.16                    | 2.44E-04              | 1.23E-04                   |
| cg17493795 | 1   | 3273407   | PRDM16;PRDM16         | Body;Body          | N_Shore                | 81.3                            | 84.47                      | -3.17                    | 2.44E-04              | 3.33E-04                   |
| cg20973421 | 1   | 9427650   | SPSB1                 | 3'UTR              | Island                 | 98.21                           | 98.39                      | -0.18                    | 2.44E-04              | 1.22E-04                   |
| cg08258719 | 1   | 16090718  | FBLIM1;FBLIM1         | 5'UTR;TSS1500      | OpenSea                | 76.07                           | 77.63                      | -1.56                    | 2.44E-04              | 9.67E-04                   |
| cg15729771 | 1   | 25071616  | CLIC4                 | TSS200             | Island                 | 3.27                            | 2.77                       | 0.50                     | 2.44E-04              | 1.10E-03                   |
| cg10513359 | 1   | 35321339  | C1orf212              | Body               | N_Shelf                | 89.77                           | 91.92                      | -2.15                    | 2.44E-04              | 2.89E-05                   |
| cg12413579 | 1   | 36108206  | PSMB2                 | TSS1500            | S_Shore                | 62.55                           | 56.48                      | 6.07                     | 2.44E-04              | 2.39E-04                   |
| cg21681327 | 1   | 41978691  | HIVEP3;HIVEP3         | Body;Body          | N_Shelf                | 96.17                           | 94.88                      | 1.29                     | 2.44E-04              | 1.99E-04                   |
| cg26682094 | 1   | 50489714  | AGBL4                 | TSS200             | Island                 | 2.41                            | 2.2                        | 0.21                     | 2.44E-04              | 1.11E-03                   |
| cg05885647 | 1   | 53926107  | DMRTB1                | Body               | Island                 | 95.86                           | 96.72                      | -0.87                    | 2.44E-04              | 2.45E-02                   |
| cg11837766 | 1   | 64239631  | ROR1;ROR1             | TSS200;TSS200      | Island                 | 1.9                             | 1.66                       | 0.23                     | 2.44E-04              | 6.22E-04                   |
| cg10482024 | 1   | 65613042  | AK3L1;AK3L1           | TSS1500;TSS200     | Island                 | 3.13                            | 2.51                       | 0.63                     | 2.44E-04              | 3.06E-04                   |
| cg16427752 | 1   | 76262302  | MSH4                  | TSS1500            | N_Shore                | 59.09                           | 62.11                      | -3.02                    | 2.44E-04              | 1.01E-03                   |
| cg19236050 | 1   | 110785089 |                       |                    | OpenSea                | 89.5                            | 91.26                      | -1.75                    | 2.44E-04              | 2.90E-03                   |
| cg26906021 | 1   | 155146940 | KRTCAP2;TRIM46        | TSS1500;Body       | N_Shore                | 1.55                            | 1.25                       | 0.30                     | 2.44E-04              | 1.22E-03                   |
| cg04361579 | 1   | 203152047 | CHI3L1                | Body               | OpenSea                | 99.05                           | 98.67                      | 0.38                     | 2.44E-04              | 1.75E-04                   |
| cg02985240 | 1   | 235468148 | ARID4B;ARID4B         | Body;Body          | OpenSea                | 92.55                           | 89.29                      | 3.26                     | 2.44E-04              | 1.39E-03                   |
| cg13913933 | 2   | 59202222  |                       |                    | OpenSea                | 98.11                           | 97.68                      | 0.43                     | 2.44E-04              | 7.92E-04                   |
| cg23116322 | 2   | 63276478  | OTX1                  | TSS1500            | Island                 | 1.41                            | 1.26                       | 0.15                     | 2.44E-04              | 1.88E-03                   |
| cg25627714 | 2   | 97174709  | NEURL3                | TSS1500            | S_Shore                | 97.58                           | 96.92                      | 0.67                     | 2.44E-04              | 2.32E-04                   |
| cg01215936 | 2   | 105469514 |                       |                    | Island                 | 2.36                            | 2.09                       | 0.28                     | 2.44E-04              | 2.06E-04                   |
| cg25095994 | 2   | 231191727 | SP140L                | TSS200             | OpenSea                | 2.68                            | 2.23                       | 0.45                     | 2.44E-04              | 1.63E-03                   |
| cg16930811 | 3   | 49907666  | CAMKV                 | TSS1500            | S_Shore                | 35.98                           | 33.71                      | 2.27                     | 2.44E-04              | 1.23E-04                   |
| cg02619135 | 3   | 51428440  | RBM15B                | TSS1500            | Island                 | 1.81                            | 1.47                       | 0.35                     | 2.44E-04              | 5.45E-04                   |
| cg08450501 | 3   | 136580965 | NCK1                  | TSS200             | Island                 | 7.32                            | 5.8                        | 1.51                     | 2.44E-04              | 1.19E-03                   |
| cg00995327 | 3   | 142838847 | CHST2;CHST2           | 5'UTR;1stExon      | Island                 | 2.35                            | 1.93                       | 0.42                     | 2.44E-04              | 7.25E-04                   |
| cg19273995 | 4   | 27086400  |                       |                    | OpenSea                | 3.97                            | 3.17                       | 0.80                     | 2.44E-04              | 3.39E-04                   |
| cg00241998 | 4   | 40058606  | N4BP2;N4BP2;LOC344967 | 1stExon;5'UTR;Body | Island                 | 1.79                            | 1.69                       | 0.10                     | 2.44E-04              | 4.51E-03                   |
| cg22105702 | 4   | 78978722  | FRAS1;FRAS1           | TSS200;TSS200      | Island                 | 1.24                            | 1.11                       | 0.13                     | 2.44E-04              | 7.35E-05                   |
| cg19763168 | 4   | 84256184  | HPSE;HPSE;HPSE        | 5'UTR;TSS200;5'UTR | Island                 | 3.16                            | 2.72                       | 0.43                     | 2.44E-04              | 2.46E-03                   |

|            |    |           |                       |                                   |         |       |       |       |          |          |
|------------|----|-----------|-----------------------|-----------------------------------|---------|-------|-------|-------|----------|----------|
| cg21262733 | 4  | 120988587 | MAD2L1                | TSS1500                           | S_Shore | 2.82  | 2.32  | 0.49  | 2.44E-04 | 2.44E-04 |
| cg23427912 | 4  | 189059510 | TRIML1                | TSS1500                           | OpenSea | 93.31 | 89.1  | 4.21  | 2.44E-04 | 2.14E-03 |
| cg07830906 | 5  | 264645    |                       |                                   | S_Shelf | 92.2  | 91.51 | 0.69  | 2.44E-04 | 1.18E-04 |
| cg10812634 | 5  | 126409211 | FLJ44606;FLJ44606     | TSS200;TSS200                     | Island  | 16.25 | 10.21 | 6.04  | 2.44E-04 | 2.00E-04 |
| cg15405432 | 5  | 126409310 | FLJ44606;FLJ44606     | TSS200;TSS200                     | Island  | 10.74 | 7.34  | 3.41  | 2.44E-04 | 3.76E-03 |
| cg23171203 | 5  | 128796099 | ADAMTS19              | TSS200                            | Island  | 1.72  | 2.13  | -0.41 | 2.44E-04 | 3.14E-04 |
| cg10194341 | 6  | 43027125  | KLC4;MRPL2;KLC4;MRPL2 | TSS1500;1stExon;<br>TSS1500;5'UTR | Island  | 1.23  | 1.13  | 0.11  | 2.44E-04 | 5.21E-03 |
| cg10207999 | 6  | 43588662  | GTPBP2                | 3'UTR                             | OpenSea | 90.87 | 92.85 | -1.98 | 2.44E-04 | 8.07E-04 |
| cg27238071 | 6  | 71998145  | OGFRL1                | TSS1500                           | Island  | 1.55  | 1.32  | 0.23  | 2.44E-04 | 6.25E-04 |
| cg02192300 | 6  | 114663564 |                       |                                   | Island  | 3.59  | 3.03  | 0.56  | 2.44E-04 | 1.63E-03 |
| cg06643622 | 7  | 117437223 | CTTNBP2               | Body                              | OpenSea | 84.31 | 79.45 | 4.86  | 2.44E-04 | 6.17E-05 |
| cg05793193 | 7  | 152161912 | LOC100128822          | Body                              | Island  | 1.48  | 1.13  | 0.35  | 2.44E-04 | 5.49E-04 |
| cg10293422 | 8  | 17434503  | PDGFRL                | TSS200                            | N_Shore | 2.45  | 2.16  | 0.30  | 2.44E-04 | 6.09E-05 |
| cg03508052 | 8  | 17556355  | MTUS1;MTUS1;MTUS1     | Body;TSS1500;Body                 | OpenSea | 97.87 | 97.07 | 0.80  | 2.44E-04 | 5.30E-04 |
| cg20523466 | 8  | 98900895  | MATN2;MATN2           | Body;Body                         | OpenSea | 72.54 | 74.67 | -2.12 | 2.44E-04 | 1.28E-03 |
| cg01716084 | 8  | 142367700 | GPR20                 | Body                              | Island  | 87.84 | 89.7  | -1.86 | 2.44E-04 | 2.41E-03 |
| cg25098077 | 10 | 97050963  | PDLIM1                | TSS200                            | Island  | 3.08  | 2.49  | 0.59  | 2.44E-04 | 1.40E-04 |
| cg20040041 | 10 | 127812674 | ADAM12;ADAM12         | Body;Body                         | OpenSea | 98.05 | 97.4  | 0.65  | 2.44E-04 | 1.66E-04 |
| cg10028666 | 10 | 135050775 | VENTX                 | TSS1500                           | Island  | 6.82  | 5.85  | 0.97  | 2.44E-04 | 1.41E-03 |
| cg21117210 | 11 | 31849194  |                       |                                   | S_Shore | 6.72  | 9.21  | -2.50 | 2.44E-04 | 3.19E-03 |
| cg09654997 | 11 | 46259561  |                       |                                   | Island  | 2.11  | 1.88  | 0.23  | 2.44E-04 | 1.38E-03 |
| cg24407327 | 11 | 64411428  | NRXN2;NRXN2;NRXN2     | TSS1500;Body;Body                 | S_Shore | 3.04  | 2.74  | 0.30  | 2.44E-04 | 1.57E-04 |
| cg24940248 | 11 | 118796872 |                       |                                   | S_Shore | 1.74  | 1.49  | 0.25  | 2.44E-04 | 3.68E-03 |
| cg24509916 | 11 | 133809895 | IGSF9B                | Body                              | OpenSea | 88.04 | 86.88 | 1.16  | 2.44E-04 | 4.72E-05 |
| cg00719651 | 12 | 47225449  |                       |                                   | Island  | 16.54 | 13.23 | 3.31  | 2.44E-04 | 4.37E-03 |
| cg26201787 | 12 | 77157648  | ZDHC17                | TSS1500                           | Island  | 2.34  | 2.12  | 0.22  | 2.44E-04 | 2.03E-04 |
| cg18213653 | 12 | 112605734 | C12orf51              | Body                              | OpenSea | 60.08 | 62.19 | -2.11 | 2.44E-04 | 4.10E-03 |
| cg05836979 | 12 | 133377847 | GOLGA3                | Body                              | N_Shore | 86.99 | 88.59 | -1.60 | 2.44E-04 | 3.81E-03 |
| cg05359130 | 14 | 29228970  |                       |                                   | OpenSea | 6.04  | 4.76  | 1.28  | 2.44E-04 | 8.69E-04 |
| cg26223968 | 14 | 101204240 |                       |                                   | S_Shelf | 90.06 | 92.17 | -2.11 | 2.44E-04 | 1.67E-03 |
| cg09447749 | 15 | 65195746  |                       |                                   | N_Shelf | 97.5  | 96.9  | 0.59  | 2.44E-04 | 5.25E-04 |
| cg11200462 | 15 | 66786368  | SNAPC5                | 3'UTR                             | N_Shelf | 97.97 | 97.02 | 0.95  | 2.44E-04 | 1.28E-03 |
| cg16414568 | 15 | 91473511  | UNC45A                | 5'UTR                             | Island  | 7.46  | 4.55  | 2.91  | 2.44E-04 | 9.21E-04 |
| cg06647218 | 16 | 68279240  | PLA2G15               | TSS200                            | Island  | 1.82  | 1.69  | 0.13  | 2.44E-04 | 7.58E-03 |
| cg09126659 | 16 | 70207304  | CLEC18C               | TSS1500                           | OpenSea | 87.46 | 85.17 | 2.30  | 2.44E-04 | 1.50E-04 |
| cg07497907 | 16 | 77367200  | ADAMTS18              | Body                              | OpenSea | 85.52 | 80.89 | 4.63  | 2.44E-04 | 6.12E-06 |
| cg01541600 | 16 | 87988715  | BANP;BANP             | 5'UTR;5'UTR                       | N_Shelf | 37.16 | 34.86 | 2.30  | 2.44E-04 | 4.97E-07 |
| cg25432975 | 17 | 1959066   | HIC1;HIC1             | TSS1500;5'UTR                     | Island  | 3.88  | 3.45  | 0.44  | 2.44E-04 | 2.41E-04 |

|            |    |           |                       |                           |         |       |       |       |          |          |
|------------|----|-----------|-----------------------|---------------------------|---------|-------|-------|-------|----------|----------|
| cg14170220 | 17 | 21220411  |                       |                           | Island  | 14.24 | 16.4  | -2.15 | 2.44E-04 | 2.76E-05 |
| cg04424940 | 17 | 42264171  | TMUB2;TMUB2;C17orf65  | TSS1500;<br>TSS200;TSS200 | Island  | 2.1   | 1.86  | 0.23  | 2.44E-04 | 1.01E-02 |
| cg13096688 | 17 | 43568337  | PLEKHM1               | TSS200                    | Island  | 5.61  | 4.23  | 1.38  | 2.44E-04 | 9.96E-04 |
| cg20163532 | 17 | 56064356  | VEZF1                 | Body                      | N_Shore | 2     | 1.7   | 0.30  | 2.44E-04 | 3.22E-05 |
| cg01944585 | 17 | 72732912  | RAB37;RAB37;RAB37     | TSS200;TSS1500;<br>Body   | Island  | 1.23  | 1.06  | 0.17  | 2.44E-04 | 4.94E-04 |
| cg12768640 | 19 | 7795428   | CLEC4G                | Body                      | Island  | 7.45  | 6.18  | 1.27  | 2.44E-04 | 6.20E-04 |
| cg08821193 | 19 | 13068151  | GADD45GIP1            | TSS200                    | Island  | 3.87  | 3.13  | 0.74  | 2.44E-04 | 1.09E-03 |
| cg21122529 | 19 | 16652680  | CHERP                 | Body                      | Island  | 2.61  | 2.11  | 0.50  | 2.44E-04 | 3.82E-06 |
| cg06419476 | 19 | 42636978  | POU2F2                | TSS1500                   | N_Shore | 33.53 | 31.83 | 1.70  | 2.44E-04 | 5.43E-04 |
| cg01735890 | 20 | 62884594  |                       |                           | N_Shelf | 97.46 | 96.39 | 1.06  | 2.44E-04 | 6.28E-04 |
| cg24423088 | 21 | 32185365  | KRTAP8-1              | 1stExon                   | OpenSea | 96.91 | 97.89 | -0.98 | 2.44E-04 | 1.25E-04 |
| cg12543338 | X  | 149106022 | LOC100272228;CXorf40B | TSS1500;5'UTR             | N_Shore | 14.7  | 12.62 | 2.08  | 2.44E-04 | 1.40E-03 |

**Table S2.** DAVID analysis for CpGs showing biological pathways. The table includes pathways that achieved an unadjusted *P*-value <0.05, ranked in descending order of enrichment.

| <b>Biological Pathway</b>                       | <b>Count</b> | <b>P-Value</b> | <b>Benjamini P-Value</b> |
|-------------------------------------------------|--------------|----------------|--------------------------|
| Epidermal growth factor (EGF)-like domain       | 5            | 0.006          | 0.63                     |
| EGF-like domain                                 | 4            | 0.032          | 0.65                     |
| EGF                                             | 4            | 0.043          | 0.94                     |
| Metal ion-binding site: Zinc; in inhibited form | 3            | 0.005          | 0.78                     |
| Peptidase M12B, ADAM/reprolysin                 | 3            | 0.007          | 0.45                     |
| Peptidase M12B, propeptide                      | 3            | 0.007          | 0.45                     |
| Domain: Peptidase M12B                          | 3            | 0.007          | 0.66                     |
| Domain: Disintegrin                             | 3            | 0.007          | 0.52                     |
| Short sequence motif: Cysteine switch           | 3            | 0.008          | 0.46                     |
| Metalloprotease                                 | 4            | 0.010          | 0.47                     |
| Metallopeptidase, catalytic domain              | 3            | 0.026          | 0.79                     |
| Metallopeptidase activity                       | 3            | 0.031          | 0.80                     |
| Domain: B30.2/SPRY                              | 3            | 0.034          | 0.83                     |
| Concanavalin A-like lectin/glucanase, subgroup  | 4            | 0.034          | 0.79                     |
| B30.2/SPRY domain                               | 3            | 0.037          | 0.74                     |
| Zinc                                            | 15           | 0.007          | 0.58                     |
| Zinc ion binding                                | 9            | 0.042          | 0.77                     |

**Table S3.** Comparison of significant CpGs differentially methylated in our study and other human DE exposure studies. The  $\Delta\beta$  values calculated in the two other studies correspond to ACE calculations in the current study.

|            |                    | <b>Clifford et al. (2017) [29]</b>  |                      | <b>Current Study</b> |               |                    |
|------------|--------------------|-------------------------------------|----------------------|----------------------|---------------|--------------------|
| CpG        | Gene               | $\Delta\beta$<br>(post-DE – pre-DE) | P-Value              | $\Delta\beta$<br>ACE | Exact P-value | Asymptotic P-value |
| cg16058975 | --                 | -0.109                              | 4.0x10 <sup>-3</sup> | -0.0247              | 0.000732      | 0.00681            |
| cg08548659 | --                 | -0.104                              | 8.0x10 <sup>-4</sup> | -0.0429              | 0.0125        | 0.00954            |
| cg10231182 | <i>EPS8</i>        | -0.101                              | 0.0042               | -0.0446              | 0.0344        | 0.0310             |
| cg21442419 | <i>SKI</i>         | -0.103                              | 2.0x10 <sup>-4</sup> | -0.0152              | 0.0396        | 0.0355             |
| cg11060532 | <i>HOXB3</i>       | -0.115                              | 3.0x10 <sup>-4</sup> | -0.0572              | 0.0454        | 0.0473             |
| cg06871919 | <i>C5orf22</i>     | -0.102                              | 0.0052               | -0.0414              | 0.0474        | 0.0451             |
|            |                    | <b>Jiang et al. (2014) [28]</b>     |                      | <b>Current Study</b> |               |                    |
| CpG        | Gene               | $\Delta\beta$ (post-DE – pre-DE)    |                      | $\Delta\beta$<br>ACE | Exact P-Value | Asymptotic P-value |
| cg02857074 | <i>CACNA2D1</i>    | -0.033                              |                      | 0.0264               | 0.0303        | 0.0406             |
| cg23670794 | <i>ZBED2; CD96</i> | -0.020                              |                      | 0.0214               | 0.0442        | 0.0434             |
| cg07376029 | <i>GC</i>          | -0.024                              |                      | 0.0229               | 0.0481        | 0.0451             |
| cg17624536 | --                 | 0.025                               |                      | 0.00375              | 0.0496        | 0.0494             |

**Figure S1.** Manhattan plot for the epigenome-wide analyses with asymptotic  $P$ -values (paired  $t$ -tests). The dashed orange line is the minimum possible  $P$ -value from an exact test.

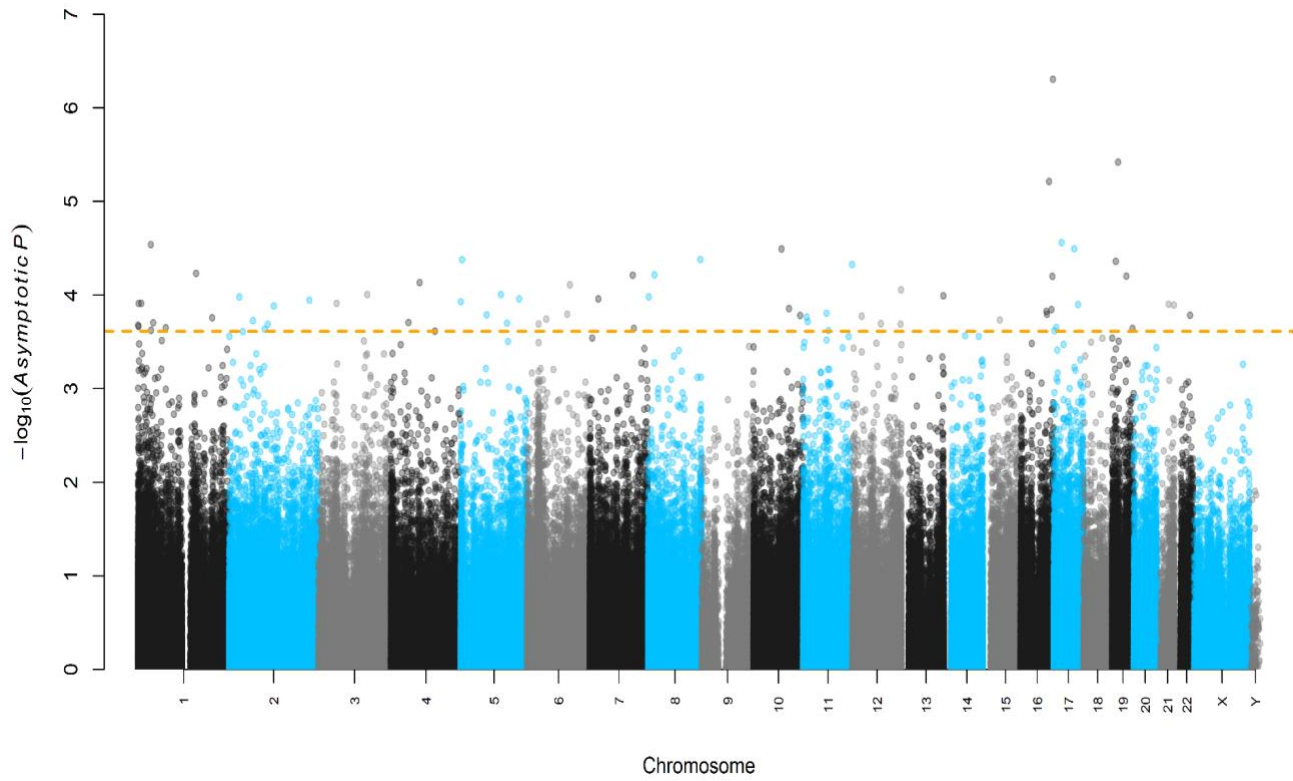

**Figure S2.** Volcano plot for the epigenome-wide analyses with asymptotic  $P$ -values (paired  $t$ -tests).

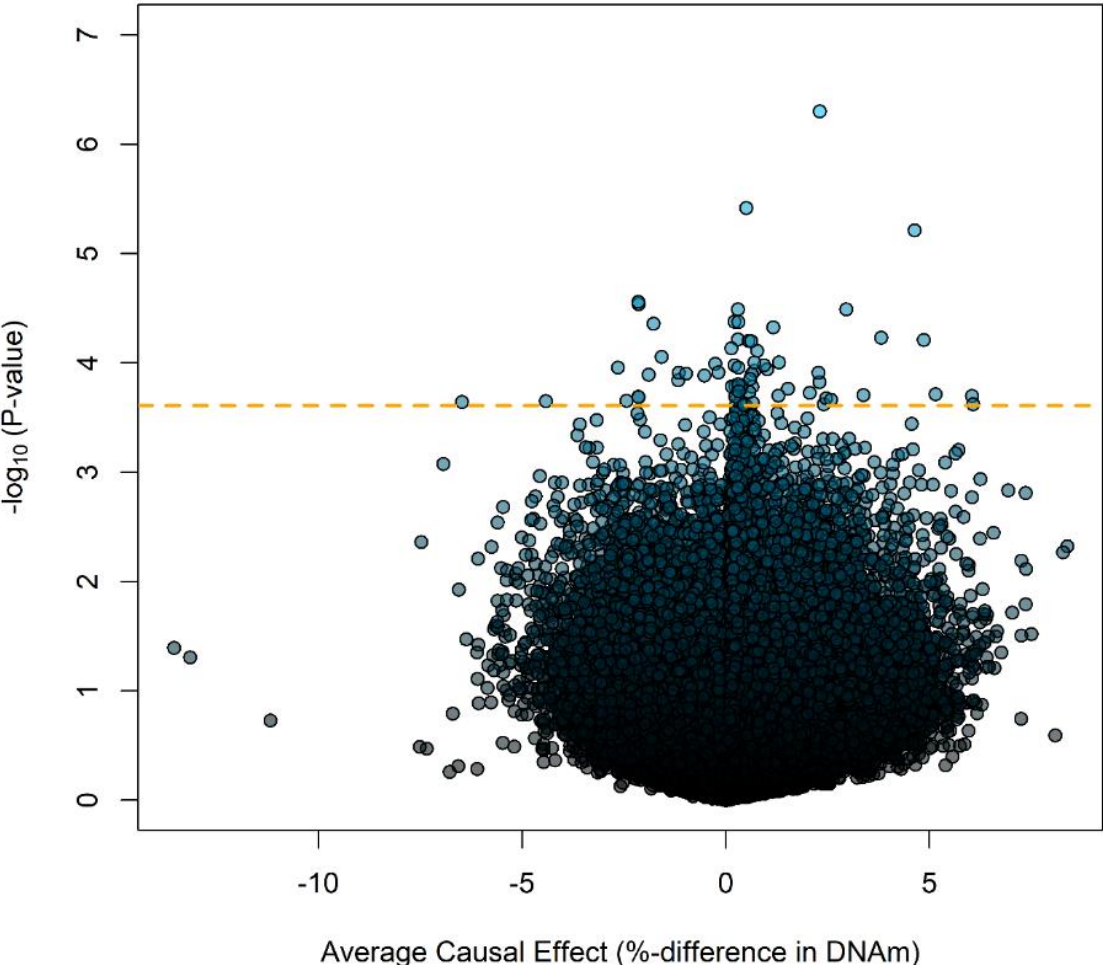



**Figure S3.** Quantile-Quantile plot for the epigenome-wide analyses of asymptotic vs. expected  $P$ -values.

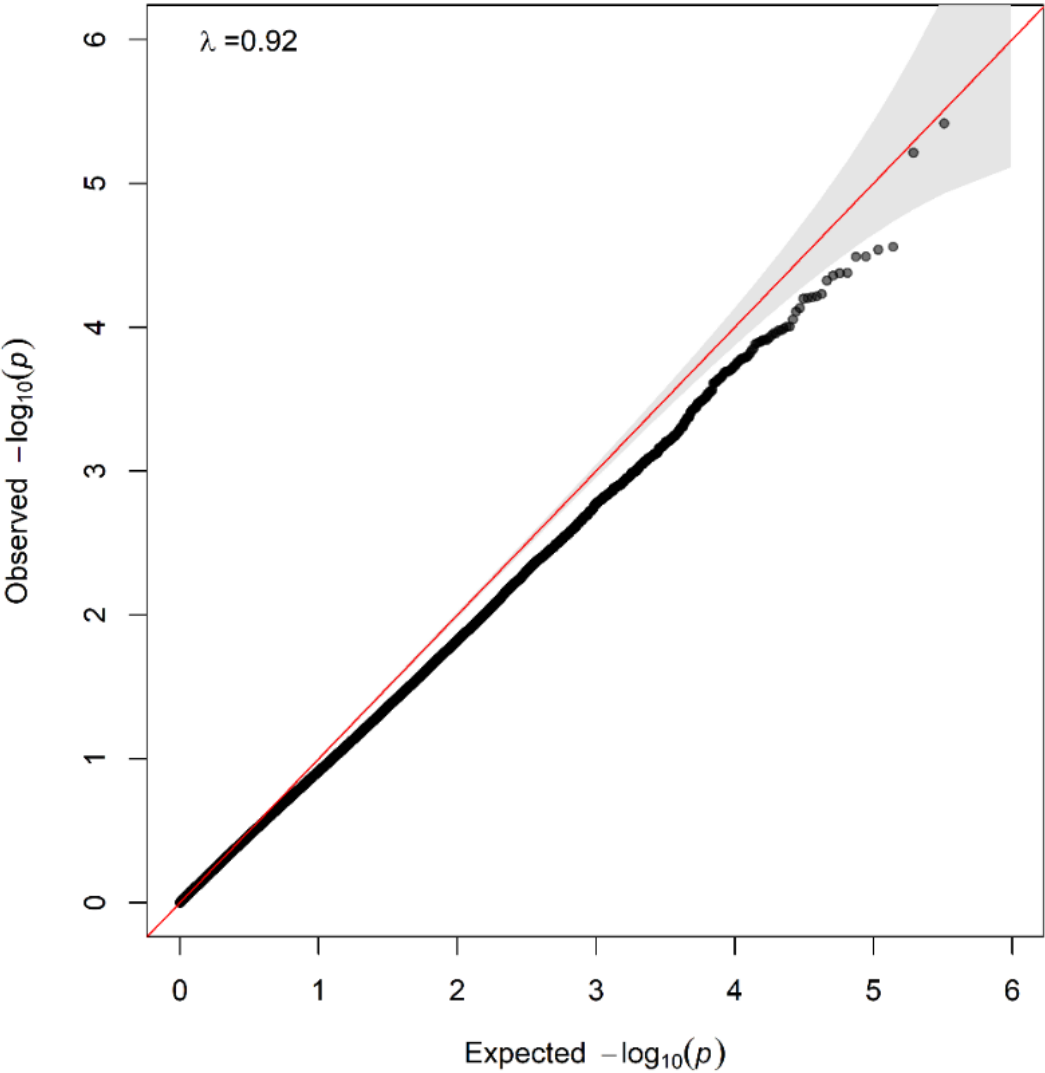

Supplement: dvab003_supplementary_data.pdf [file dvab003_supplementary_data.pdf]
